# Supplementary material
Source: PubMed Central journal article supplement (PMC6946372)
Supplement: NIHMS1538079-supplement-1.pdf [file NIHMS1538079-supplement-1.pdf]

# Baystate Medical Center

## CARDIAC REHABILITATION PROGRAM INSURANCE INFORMATION

Welcome to the Outpatient cardiac Rehabilitation Program at Baystate Medical Center.  
To prevent unexpected bills due to your participation in our program we ask you to call your insurance company and complete this form **PRIOR** to your first appointment

Your cooperation with this matter is greatly appreciated.

Patient Name \_\_\_\_\_ Date Insurance Company Called: \_\_\_\_\_

Diagnosis: \_\_\_\_\_ Heart Attack \_\_\_\_\_ Stable Angina \_\_\_\_\_ Angioplasty  
\_\_\_\_\_ Angioplasty with Stent \_\_\_\_\_ Heart Bypass Surgery \_\_\_\_\_ Heart Valve Surgery  
\_\_\_\_\_ Heart Failure \_\_\_\_\_ Cardiomyopathy

1. **Please call your insurance company and ask the following questions.** Please write the responses in the space below and bring this completed form with you on your first visit. You will also need to give this form with your insurance card to the secretaries who will review the information below.

a. Does my insurance plan cover outpatient hospital-based Cardiac Rehabilitation Program for the diagnosis above? YES \_\_\_\_\_ NO \_\_\_\_\_

b. Is there a deductible? YES \_\_\_\_\_ NO \_\_\_\_\_ Amount: \$ \_\_\_\_\_

c. Is there a co-pay? What is the amount I will owe per visit? \$ \_\_\_\_\_

d. Do I need a referral from my doctor? YES \_\_\_\_\_ NO \_\_\_\_\_

d. How many visits are covered by my plan? \_\_\_\_\_

e. How long do I have to complete these visits? \_\_\_\_\_

f. What is the Reference Number # \_\_\_\_\_

g. What is the Authorization Number # \_\_\_\_\_

2. **If your insurance company informs you of a need for a referral, contact your Primary Care Physician BEFORE your first Cardiac Rehabilitation appointment (Fax: 413-794-7125).**

3. **I understand the above information and agree to participate in Cardiac Rehabilitation/Wellness**

Participant Signature

4/17/2009

Baystate Medical Secretary

White copy- File

Date Reviewed

Yellow copy-Patient
